# Supplementary material
Source: PubMed Central journal article supplement (PMC7781844)

Figure S1

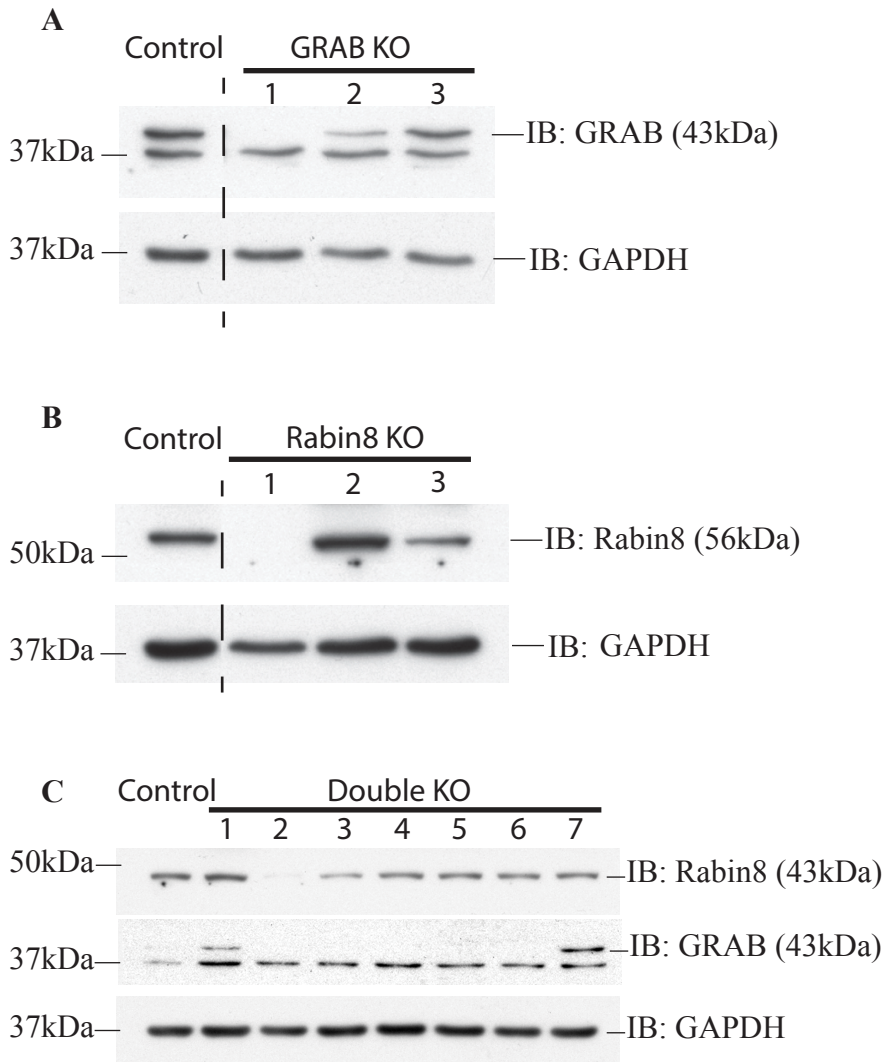

Figure S2

A

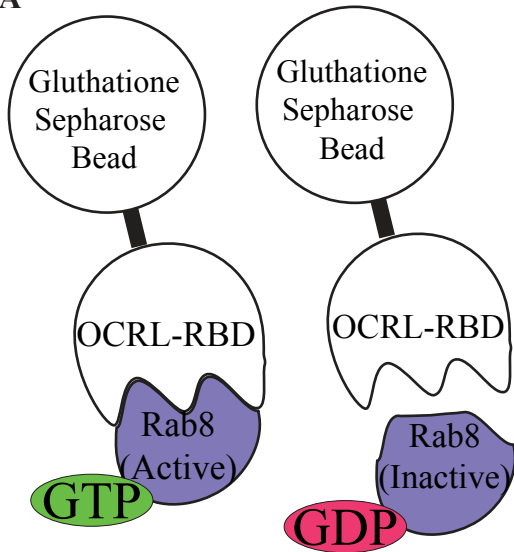

B

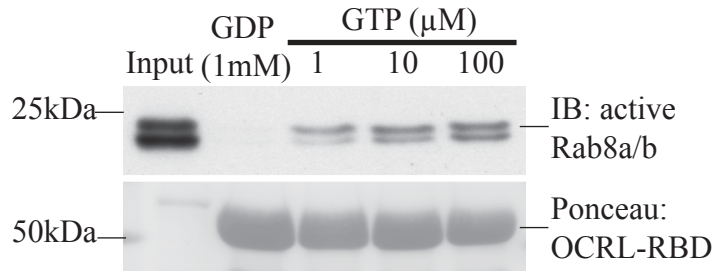

C

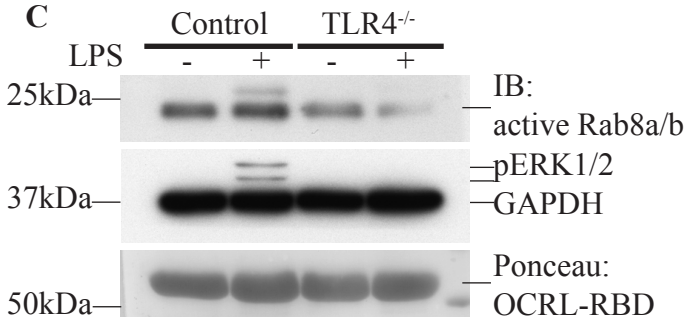

D

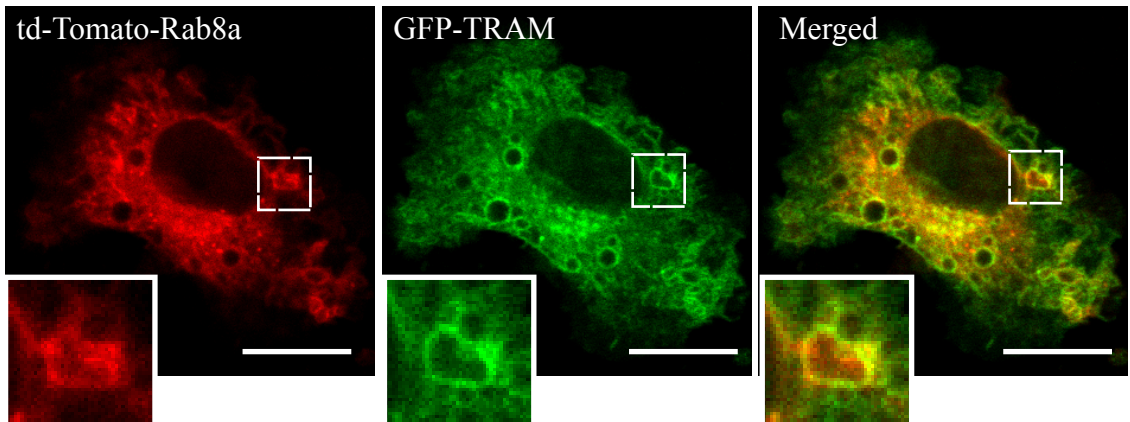

Figure S4

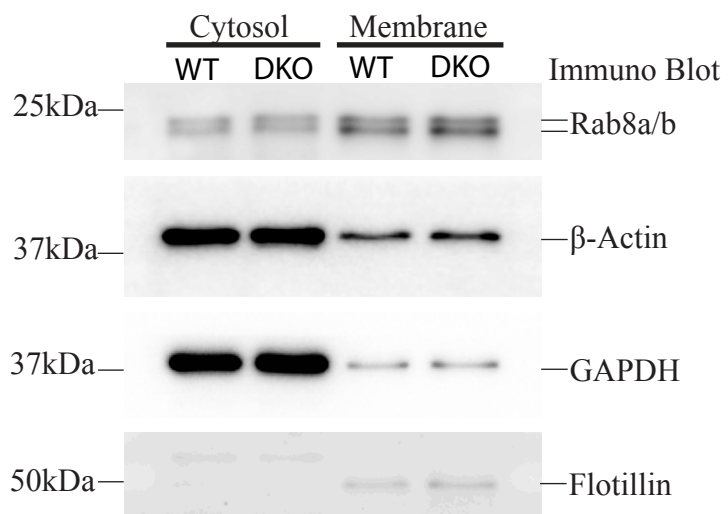

Figure S5

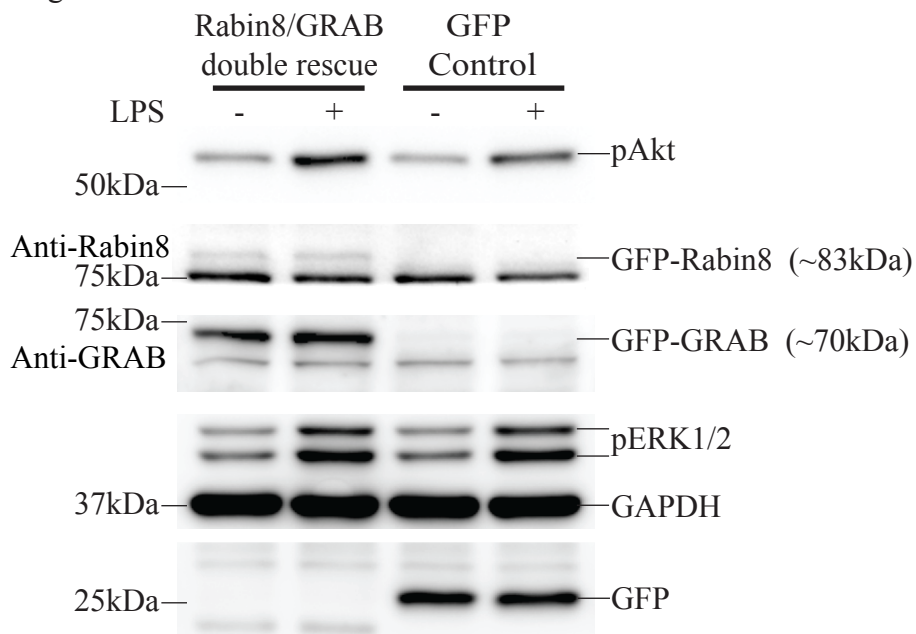

Figure S3

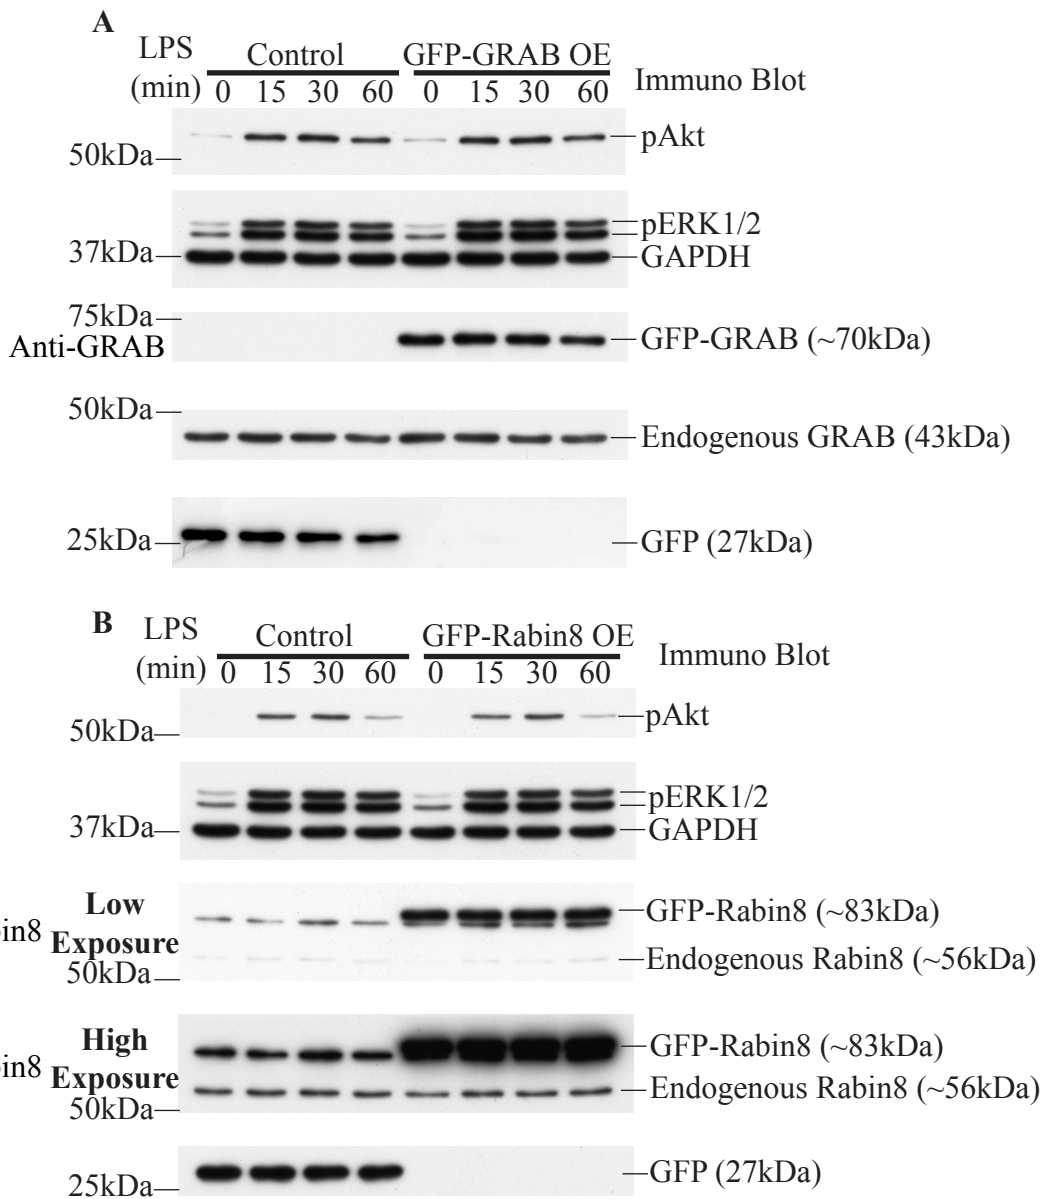

Supplement: KSGT_A_1587278_SM4195.pdf [file KSGT_A_1587278_SM4195.pdf]
